# Supplementary material
Source: PubMed Central journal article supplement (PMC4689189)
Supplement: NIHMS734399-supplement-01.pdf [file NIHMS734399-supplement-01.pdf]

## **Supplemental table 1: DISTRIBUTION OF INDIVIDUAL OBS COMPONENTS BY OBS QUARTILE**

### **Footnote supplemental table 1**

Values are presented as mean (SD) or number (%).SD =standard deviation Abbreviations PUFA = Polyunsaturated fatty acid, NSAID= Non-steroidal anti-inflammatory drug OBS= Oxidative balance score,

### **Supplemental Table 2**

#### **SENSITIVITY ANALYSIS: THE ASSOCIATION BETWEEN OBS WITHOUT ASPIRIN AND NSAIDS: ALBUMINURIA CKD AND ESRD**

<sup>a</sup>, Model 1 is the crude model <sup>b</sup>, For Albuminuria, Macroalbuminuria and CKD, Model 2 is the model adjusted for age, sex, race, region and calories. <sup>c</sup>, For ESRD, model 2 is the model adjusted for age, sex, race, region, calories BMI (body mass index), smoking, waist circumference, physical activity, education, income, diabetes, statin medications, cardiovascular disease, systolic and diastolic blood pressure, and Total Cholesterol. <sup>d</sup>, for a 5/10 unit increases in obs

### **Supplemental Table3**

#### **TABLE 3: THE LINEAR ASSOCIATION BETWEEN OBS: EGFR and OBS and Albuminuria**

<sup>a</sup>, Model 1 is the crude model <sup>b</sup>: Model 2 is adjusted for age, sex, race, region and calories

<sup>c</sup> Model 3 is adjusted for age, sex, race, region and calories, BMI (body mass index), smoking, waist circumference, physical activity, education, income, hypertension, diabetes and statin medications. <sup>d</sup>. Model 4 is adjusted for age, sex, race, region and calories, BMI (body mass index), smoking, waist circumference, physical activity, education, income, diabetes, statin medications, cardiovascular disease, systolic and diastolic blood pressure, and Total Cholesterol.

### **Supplemental Table 4**

#### **LINEAR ASSOCIATION BETWEEN INDIVIDUAL OBS COMPONENTS: CKD, AND MACROALBUMINURIA**

**Supplemental Table 1**

| <b>Characteristics<br/>(Units)</b>         | <b>Mean (by OBS quartiles)</b> |                 |                 |                   |
|--------------------------------------------|--------------------------------|-----------------|-----------------|-------------------|
|                                            | <b>Q1</b>                      | <b>Q2</b>       | <b>Q3</b>       | <b>Q4</b>         |
| <b>Total</b>                               | 4096                           | 5090            | 5453            | 4823              |
| <b>Regular Aspirin<br/>Use<sup>#</sup></b> | 963 (23.5%)                    | 2007(39.4%)     | 2522(46.2%)     | 3065(63.5%)       |
| <b>Regular NSAID Use<sup>#</sup></b>       | 264(6.5%)                      | 609(12.0%)      | 856(15.7%)      | 1195(24.8%)       |
| <b>Alcohol</b>                             |                                |                 |                 |                   |
| <b>Heavy</b>                               | 330(8.1%)                      | 224(4.4%)       | 203(3.7%)       | 113(2.3%)         |
| <b>Moderate</b>                            | 1558(38.0%)                    | 1883(37.0%)     | 2003(36.7%)     | 1585(32.9%)       |
| <b>None</b>                                | 2208(53.9%)                    | 2983(58.6%)     | 3247(59.5%)     | 3125(64.8%)       |
| <b>Selenium (mcg)</b>                      | 69.23(30.6)                    | 85.3(43.6)      | 102.1(53.0)     | 127.8(69.1)       |
| <b>Daily PUFA (g)</b>                      | 16.50(9.2)                     | 17.80(10.0)     | 53.04(19.1)     | 69.12(20.5)       |
| <b>Iron (mg)</b>                           | 17.3(14.7)                     | 22.0(16.9)      | 26.1(17.8)      | 30.5(20.2)        |
| <b>Vitamin C (mg)</b>                      | 118.43 (180.7)                 | 247.00(317.6)   | 397.7(434.89)   | 614.7( 536.7)     |
| <b>α-carotene (μg)</b>                     | 279.5 (213.35)                 | 471.7(460.83)   | 764.9(753.54)   | 1220.24( 1103.40) |
| <b>β-carotene (μg)</b>                     | 2006.7(1349.1)                 | 3468.4(3204.81) | 5760.9(5300.25) | 8960.5 (7327.4)   |
| <b>Vitamin E (α-TE)</b>                    | 31.4(78.7)                     | 74.0(139.7)     | 120.4(176.2)    | 187.8(195.2)      |
| <b>Lutein (μg)</b>                         | 823.9(616)                     | 1300.6(1038.7)  | 2003.6(1785.8)  | 3062.93( 2639.4)  |
| <b>Lycopene (μg)</b>                       | 2379.8(2611.9)                 | 3519.4 (3803.3) | 4453.5 (4547.6) | 6441.0(6255.5)    |
| <b>Cryptoxanthine (μg)</b>                 | 50.8(67.5)                     | 100.0 (112.3)   | 139.3(134.5)    | 193.7 (158.5)     |

**Supplemental Table 2**

| OBS                        | Albuminuria          |                      | Macroalbuminuria     |                      | CKD                  |                      | ESRD                 |                      |
|----------------------------|----------------------|----------------------|----------------------|----------------------|----------------------|----------------------|----------------------|----------------------|
|                            | Model 1 <sup>a</sup> | Model 2 <sup>b</sup> | Model 1 <sup>a</sup> | Model 2 <sup>b</sup> | Model 1 <sup>a</sup> | Model 2 <sup>b</sup> | Model 1 <sup>a</sup> | Model 2 <sup>c</sup> |
|                            | OR (95%CI)           | OR (95% CI)          | OR (95%CI)           | OR (95% CI)          | OR(95% CI)           | OR (95% CI)          | HR(95% CI)           | HR(95%CI)            |
| <b>Q1</b>                  | 1                    | 1                    | 1                    | 1                    | 1                    | 1                    | 1                    | 1                    |
| <b>Q2</b>                  | 0.97 (0.859, 1.09)   | 0.94 (0.84, 1.06)    | 0.90 (0.69, 1.17)    | 0.90 (0.69, 1.17)    | 1.00(0.88, 1.14)     | 0.94(0.82, 1.08)     | 1.26(0.71,2.23)      | 1.82(0.96, 3.44)     |
| <b>Q3</b>                  | 0.92 (0.82, 1.04)    | 0.86 (0.76, 0.98)    | 0.67 (0.51, 0.88)    | 0.66(0.49, 0.87)     | 0.94(0.82, 1.07)     | 0.83(0.72, 0.96)     | 0.94(0.52, 1.71)     | 1.70(0.86, 3.38)     |
| <b>Q4</b>                  | 0.94 (0.83, 1.06)    | 0.87 (0.76, 0.997)   | 0.72 (0.54, 0.97)    | 0.73 (0.53, 0.99)    | 0.78(0.68, 0.90)     | 0.7(0.60, 0.82)      | 0.57(0.28, 1.18)     | 0.82(0.33, 2.03)     |
| <b>p for trend</b>         | 0.21                 | 0.02                 | 0.0047               | 0.0069               | 0.0005               | <.0001               | 0.081                | 0.87                 |
| <b>OBS (continuous)</b>    |                      |                      |                      |                      |                      |                      |                      |                      |
| <b>5-unit<sup>d</sup></b>  | 0.95 (0.90, 1.01)    | 0.91(0.86, 0.98)     | 0.78(0.68, 0.90)     | 0.77 (0.66,0.90)     | 0.90(0.84,0.96)      | 0.84(0.78, 0.91)     | 0.75 (0.55, 1.01)    | 1.07 (0.75,1.54)     |
| <b>10-unit<sup>d</sup></b> | 0.91 (0.80, 1.03)    | 0.83 (0.73, 0.95)    | 0.61 (0.46, 0.81)    | 0.60 (0.44, 0.81)    | 0.81(0.71, 0.93)     | 0.71(0.61, 0.83)     | 0.56(0.30, 1.02)     | 1.13(0.55, 2.33)     |

**Supplemental Table 3**

| <b>OBS</b>                     | <b>eGFR</b>                |                            |                            |                            | <b>Urinary Albumin</b>     |                            |                            |                            |
|--------------------------------|----------------------------|----------------------------|----------------------------|----------------------------|----------------------------|----------------------------|----------------------------|----------------------------|
|                                | <b>Model 1<sup>a</sup></b> | <b>Model 2<sup>b</sup></b> | <b>Model 3<sup>c</sup></b> | <b>Model 4<sup>d</sup></b> | <b>Model 1<sup>a</sup></b> | <b>Model 2<sup>b</sup></b> | <b>Model 3<sup>c</sup></b> | <b>Model 4<sup>d</sup></b> |
| <b>p value</b>                 | 0.0018                     | 0.0013                     | <0.0001                    | <0.0001                    | 0.0014                     | 0.002                      | 0.0045                     | 0.004                      |
| <b>5-unit increase in OBS</b>  | -0.57                      | 0.53                       | 0.87                       | 0.88                       | -7.27                      | -7.40                      | -6.85                      | -6.91                      |
| <b>10-unit increase in OBS</b> | -1.14                      | 1.05                       | 1.73                       | 1.76                       | -14.53                     | -14.81                     | -13.69                     | -13.82                     |

**Supplemental Table 4**

| Characteristics     | CKD                |         | MACROALBUMINURIA  |         |
|---------------------|--------------------|---------|-------------------|---------|
|                     | OR( 95% CI)        | P value | OR( 95% CI)       | P value |
| Regular Aspirin Use | 1.29 (1.23, 1.35)  | <0.0001 | 1.16 (1.06, 1.28) | 0.002   |
| Regular NSAID Use   | 0.97 (0.91, 1.04)  | 0.36    | 0.88 (0.76, 1.02) | 0.085   |
| Alcohol             | 1.58 (1.45, 1.73)  | <0.0001 | 1.22 (1.03, 1.45) | 0.024   |
| Selenium            | 1.04 (0.99, 1.11)  | 0.14    | 1.14 (1.02, 1.28) | 0.024   |
| Unsaturated Fat     | 0.79 (0.74, 0.83)  | <.0001  | 0.86 (0.76, 0.96) | 0.010   |
| Iron                | 0.94 (0.89, 0.996) | 0.04    | 0.83 (0.74, 0.93) | 0.002   |
| Vitamin C           | 0.953 (0.9, 1.01)  | 0.097   | 0.89 (0.80, 1.00) | 0.059   |
| α-carotene          | 0.909 (0.86, 0.96) | 0.001   | 0.76 (0.67, 0.85) | <.0001  |
| β-carotene          | 0.855 (0.81, 0.91) | <.0001  | 0.93 (0.83, 1.04) | 0.194   |
| Lutein              | 0.83 (0.78, 0.88)  | <.0001  | 0.83 (0.73, 0.93) | 0.001   |
| Lycopene            | 0.91 (0.86, 0.96)  | 0.0011  | 0.83 (0.74, 0.94) | 0.002   |
| β-Cryptoxanthine    | 1.09 (1.03, 1.15)  | 0.0038  | 0.96 (0.85, 1.08) | 0.479   |
| a-tocopherol        | 1.19 (1.12, 1.26)  | <.0001  | 1.08 (0.96, 1.21) | 0.209   |
| Smoking             | 1.14 (1.06, 1.22)  | 0.0002  | 0.65 (0.57, 0.74) | <.0001  |
